# Supplementary material for: Clinical significance of PCDH10 promoter methylation in diffuse large B-cell lymphoma
Source: BMC Cancer. 2017 Dec 4;17:815. doi: 10.1186/s12885-017-3810-7 (PMC5715993; doi:10.1186/s12885-017-3810-7)
Supplement: Supplementary file 2 — The details of survival (OS and PFS) and other clinicopathological characteristics of 65 RCHOP-treated cases are showed in this table. (XLS 40 kb) [file 12885_2017_3810_MOESM2_ESM.xls]

## Sheet: RCHOP-treated 65 cases
No.	Age_Range	IPI	IPI_4_risk_Groups	Site	Hans_COO	Surg_RCHOP	OS_months	Censored_For_OS	PFS_months	Censored_For_PFS	PCDH10_MSP	MYC-FISH(Breakapart)
70	<60y	1	1	Nodal	non-GCB	Resection & RCHOP	69.0333	Alive	28.4667	Not_Progress	Methy	Negative
98	<60y	1	1	ExtraNodal	GCB	RCHOP	82.7	Alive	12.2	Progress	Methy	Negative
105	<60y	0	1	ExtraNodal	non-GCB	RCHOP	64.4667	Alive	64.4667	Not_Progress	Methy	Negative
96	<60y	3	3	ExtraNodal	non-GCB	RCHOP	61.6	Alive	4.6	Progress	Methy	Negative
20	<60y	1	1	ExtraNodal	non-GCB	RCHOP	68	Alive	68	Not_Progress	Methy	Negative
71	≥60y	1	1	Nodal	GCB	RCHOP	61.6	Alive	18.4333	Progress	Methy	Negative
91	≥60y	4	4	Nodal	non-GCB	RCHOP	46.5667	Alive	6.96667	Progress	Non-Methy	Negative
38	<60y	0	1	Nodal	GCB	RCHOP	67.4667	Alive	67.4667	Not_Progress	Non-Methy	Negative
79	<60y	3	3	Nodal	non-GCB	RCHOP	67.3667	Alive	7.53333	Progress	Methy	Negative
41	<60y	2	2	Nodal	non-GCB	RCHOP	80.2	Alive	6.13333	Progress	Methy	Negative
92	<60y	3	3	ExtraNodal	non-GCB	Resection & RCHOP	67	Alive	67	Not_Progress	Methy	Negative
75	≥60y	2	2	ExtraNodal	non-GCB	RCHOP	66.3	Alive	66.3	Not_Progress	Non-Methy	Negative
88	<60y	0	1	Nodal	non-GCB	RCHOP	59.9667	Alive	59.9667	Not_Progress	Methy	Negative
84	<60y	0	1	ExtraNodal	GCB	Resection & RCHOP	66.7667	Alive	66.7667	Not_Progress	Methy	Negative
17	≥60y	2	2	ExtraNodal	non-GCB	Resection & RCHOP	66.5	Alive	66.5	Not_Progress	Non-Methy	Negative
109	≥60y	1	1	Nodal	GCB	Resection & RCHOP	66.3667	Alive	66.3667	Not_Progress	Non-Methy	Negative
19	<60y	0	1	ExtraNodal	non-GCB	Resection & RCHOP	66.3667	Alive	66.3667	Not_Progress	Non-Methy	Negative
97	<60y	1	1	Nodal	non-GCB	RCHOP	66.1	Alive	66.1	Not_Progress	Non-Methy	Negative
51	<60y	1	1	ExtraNodal	non-GCB	Resection & RCHOP	65.8667	Alive	65.8667	Not_Progress	Non-Methy	Negative
95	≥60y	2	2	ExtraNodal	non-GCB	RCHOP	65.5	Alive	65.5	Not_Progress	Methy	Negative
43	<60y	1	1	ExtraNodal	GCB	Resection & RCHOP	65.3667	Alive	65.3667	Not_Progress	Methy	Negative
80	<60y	1	1	Nodal	GCB	RCHOP	65.1	Alive	65.1	Not_Progress	Non-Methy	Negative
60	≥60y	4	4	Nodal	non-GCB	RCHOP	60.6667	Alive	18.5333	Progress	Non-Methy	Negative
40	<60y	2	2	Nodal	non-GCB	RCHOP	63.4667	Alive	63.4667	Not_Progress	Non-Methy	Negative
48	≥60y	4	4	Nodal	non-GCB	RCHOP	62.2	Dead	17.2	Progress	Methy	Negative
63	≥60y	1	1	ExtraNodal	non-GCB	Resection & RCHOP	62.7333	Alive	62.7333	Not_Progress	Methy	Negative
44	<60y	1	1	Nodal	non-GCB	RCHOP	65.0333	Alive	65.0333	Not_Progress	Non-Methy	Negative
99	<60y	1	1	Nodal	GCB	RCHOP	7.9	Alive			Non-Methy	Breakapart
61	<60y	1	1	ExtraNodal	non-GCB	RCHOP	34.1667	Dead	32.1	Progress	Methy	Negative
65	<60y	4	4	ExtraNodal	GCB	RCHOP	6.73333	Dead	6.73333	Progress	Methy	Negative
68	<60y	0	1	ExtraNodal	GCB	RCHOP	60.7	Alive	60.7	Not_Progress	Non-Methy	Negative
85	≥60y	2	2	Nodal	GCB	RCHOP	61.1	Alive	61.1	Not_Progress	Non-Methy	Negative
64	≥60y	1	1	ExtraNodal	non-GCB	Resection & RCHOP	61.4	Alive	61.4	Not_Progress	Methy	Negative
82	<60y	0	1	Nodal	GCB	RCHOP	61.4	Alive	61.4	Not_Progress	Non-Methy	Negative
35	<60y	1	1	Nodal	GCB	RCHOP	60.9333	Alive	60.9333	Not_Progress	Methy	Negative
72	<60y	3	3	Nodal	non-GCB	RCHOP	14.3667	Dead	7.23333	Progress	Methy	Negative
52	<60y	1	1	Nodal	non-GCB	RCHOP	17.1	Dead	17.1	Progress	Methy	Negative
30	<60y	1	1	Nodal	non-GCB	RCHOP	61.5	Alive	61.5	Not_Progress	Non-Methy	Negative
31	<60y	2	2	Nodal	non-GCB	RCHOP	28.5333	Dead	7.06667	Progress	Non-Methy	Negative
106	<60y	1	1	Nodal	non-GCB	RCHOP	11.0333	Dead	0.266667	Progress	Methy	Negative
87	≥60y	4	4	Nodal	non-GCB	RCHOP	5.8	Dead	5.33333	Progress	Non-Methy	Negative
77	≥60y	1	1	Nodal	non-GCB	RCHOP	3	Dead	2.53333	Progress	Methy	Negative
26	≥60y	2	2	Nodal	GCB	RCHOP	58.1667	Alive	15.7	Progress	Non-Methy	Negative
42	<60y	0	1	Nodal	GCB	RCHOP	57.9333	Alive	57.9333	Not_Progress	Non-Methy	Negative
29	≥60y	4	4	Nodal	non-GCB	RCHOP	56.0333	Alive	43.0333	Progress	Non-Methy	Negative
93	<60y	3	3	Nodal	non-GCB	RCHOP	25.7333	Dead	6.5	Progress	Methy	Negative
25	<60y	3	3	Nodal	GCB	RCHOP	58.6667	Alive	58.6667	Not_Progress	Non-Methy	Negative
50	<60y	1	1	Nodal	non-GCB	RCHOP	8.3	Dead	2.16667	Progress	Non-Methy	Negative
21	<60y	0	1	ExtraNodal	GCB	RCHOP	58.5667	Alive	58.5667	Not_Progress	Non-Methy	Breakapart
45	≥60y	4	4	Nodal	GCB	RCHOP	11.9	Dead	3.33333	Progress	Methy	Negative
37	≥60y	3	3	Nodal	non-GCB	RCHOP	34.2667	Dead	19.2667	Progress	Methy	Negative
13	<60y	2	2	Nodal	GCB	RCHOP	36.4333	Dead	36.4333	Progress	Methy	Negative
24	≥60y	2	2	Nodal	non-GCB	RCHOP	52.8667	Alive	52.8667	Not_Progress	Methy	Negative
3	≥60y	3	3	ExtraNodal	GCB	RCHOP	13.8	Dead	13.3333	Progress	Methy	Breakapart
10	<60y	0	1	Nodal	GCB	Resection & RCHOP	57.1333	Alive	57.1333	Not_Progress	Methy	Negative
2	<60y	0	1	Nodal	non-GCB	RCHOP	57.0333	Alive	57.0333	Not_Progress	Non-Methy	Negative
16	<60y	0	1	ExtraNodal	non-GCB	RCHOP	55.7	Alive	55.7	Not_Progress	Methy	Negative
23	≥60y	3	3	Nodal	non-GCB	RCHOP	39.3333	Dead	39.3333	Progress	Methy	Negative
14	≥60y	2	2	ExtraNodal	GCB	Resection & RCHOP	42.4	Dead	38.3333	Progress	Non-Methy	Negative
54	<60y	0	1	Nodal	non-GCB	RCHOP	55.0333	Alive	55.0333	Not_Progress	Non-Methy	Negative
46	<60y	1	1	Nodal	non-GCB	RCHOP	55.0333	Alive	55.0333	Not_Progress	Methy	Negative
49	≥60y	2	2	ExtraNodal	GCB	Resection & RCHOP	54.9333	Alive	54.9333	Not_Progress	Non-Methy	Breakapart
11	≥60y	3	3	Nodal	non-GCB	Resection & RCHOP	54.7667	Alive	54.7667	Not_Progress	Non-Methy	Negative
57	≥60y	3	3	ExtraNodal	non-GCB	Resection & RCHOP	54.5667	Alive	54.5667	Not_Progress	Non-Methy	Negative
108	<60y	2	2	Nodal	non-GCB	RCHOP	12.1667	Dead	3.86667	Progress	Methy	Negative
